# Supplementary material for: Transgenerational inheritance of impaired larval T cell development in zebrafish
Source: PubMed Central journal article supplement (PMC7481223; doi:10.1038/s41467-020-18289-9), 2020-09-09
Supplement: 41467_2020_18289_MOESM2_ESM.pdf [file 41467_2020_18289_MOESM2_ESM.pdf]

## **Descriptions of Additional Supplementary Files**

### **Supplementary Data 1.**

**Description:** Hypomethylated differentially methylated regions distinguishing sperm DNA of G4\* and G4+ males.

### **Supplementary Data 2.**

**Description:** Hypermethylated differentially methylated regions distinguishing sperm DNA of G4\* and G4+ males.

### **Supplementary Data 3.**

**Description:** Differentially methylated regions in G4 sperm grouped according to methylation status in G2 mutant sperm
